# Supplementary material
Source: publisher site journal article supplement (https://www.dovepress.com/article/590186)
Supplement: Supplementary file 1 [file 590186%20Revised%20Supplementary.docx]

# Supplementary Material

**Table S1 Clinical characteristics of the Participants**

| Group | Participants | Sex | Age | Amblyopic eye / non-dominant eye | BF | BCVA（Amblyopic eye / non-dominant eye) | BCVA（logMAR, Amblyopic eye / non-dominant eye） | Previous treatment |
| --- | --- | --- | --- | --- | --- | --- | --- | --- |
|  |
|  |
| Control | 1 | Male | 12 | Left | 1.6 | 1.0 | 0 | NA |  |
| Control | 2 | Female | 10 | Left | 1.6 | 1.0 | 0 | NA |  |
| Control | 3 | Female | 11 | Left | 1.6 | 1.0 | 0 | NA |  |
| Control | 4 | Female | 16 | Left | 1.6 | 1.0 | 0 | NA |  |
| Control | 5 | Female | 14 | Left | 1.6 | 1.0 | 0 | NA |  |
| Control | 6 | Female | 12 | Left | 1.6 | 1.0 | 0 | NA |  |
| Control | 7 | Male | 12 | Left | 1.6 | 1.0 | 0 | NA |  |
| Control | 8 | Male | 13 | Left | 1.6 | 1.0 | 0 | NA |  |
| Control | 9 | Female | 12 | Left | 1.6 | 1.0 | 0 | NA |  |
| Control | 10 | Male | 17 | Left | 1.6 | 1.0 | 0 | NA |  |
| Control | 11 | Male | 9 | Left | 1.6 | 1.0 | 0 | NA |  |
| Patient | 1 | Female | 13 | Left | 2.3 | 0.15 | 0.82 | Patching |  |
| Patient | 2 | Female | 15 | Left | 1.7 | 0.5 | 0.30 | Patching |  |
| Patient | 3 | Male | 8 | Left | 2.3 | 0.5 | 0.30 | Patching |  |
| Patient | 4 | Female | 15 | Right | 2 | 0.6 | 0.22 | Patching |  |
| Patient | 5 | Female | 14 | Left | 1.8 | 0.6 | 0.22 | Patching |  |
| Patient | 6 | Male | 8 | Right | 2.6 | 0.4 | 0.40 | Patching |  |
| Patient | 7 | Female | 9 | Left | 2.9 | 0.6 | 0.22 | Patching |  |
| Patient | 8 | Female | 10 | Left | 3.6 | 0.4 | 0.40 | Patching |  |
| Patient | 9 | Female | 7 | Left | 2 | 0.5 | 0.30 | Patching |  |
| Patient | 10 | Female | 12 | Left | 2 | 0.3 | 0.52 | Patching |  |
| Patient | 11 | Male | 12 | Left | 2.6 | 0.5 | 0.30 | Patching |  |
| Patient | 12 | Female | 7 | Right | 2.3 | 0.5 | 0.30 | Patching |  |
| Patient | 13 | Female | 8 | Left | 2.6 | 0.2 | 0.70 | Patching |  |
| Patient | 14 | Female | 12 | Left | 2.6 | 0.5 | 0.30 | Patching |  |

BF: Binocular function; BCVA: Best-corrected visual acuity; NA: Not applicable.

**Table S2 Modified binocular function score calculation**

| Near Stereoacuity | Binocular Function Score (near) |
| --- | --- |
| **Titmus Stereotest (arcsec)** |  |
| 40 | 1.6 |
| 50 | 1.7 |
| 60 | 1.8 |
| 80 | 1.9 |
| 100 | 2 |
| 140 | 2.1 |
| 200 | 2.3 |
| 400 | 2.6 |
| 800 | 2.9 |
| **Stereo Fly Test** |  |
| 3552 | 3.6 |
| **Worth 4-Dot Test** |  |
| Fusion | 4 |
| Suppression | 5 |

The binocular function score (1.6 – 3.6) was defined by the log value of the Titmus stereotest and stereo fly test.
